# Supplementary material for: Confounding by Repetitive Elements and CpG Islands Does Not Explain the Association between Hypomethylation and Genomic Instability
Source: PLoS Genet. 2013 Feb 28;9(2):e1003333. doi: 10.1371/journal.pgen.1003333 (PMC3585018; doi:10.1371/journal.pgen.1003333)
Supplement: Table S2 — Regression analysis of the predictive power of methylation and other genomic factors for CNV counts. (XLS) [file pgen.1003333.s002.xls]

## Sheet: Table S2 - AIC Comparisons
Regression analysis of the predictive power of methylation and other genomic factors for CNV counts
response~(CpG_Island_Coverage)+(LINE_Coverage)+(LTR_Coverage)+(Satellite_Coverage)+(SINE_Coverage)+(Methylation) or leaving out one factor
	AIC All 6 Factors	AIC Without Methylation	Difference from 6 factors	AIC Without CpG Island	Difference from 6 factors	AIC Without LINE	Difference from 6 factors	AIC Without LTR	Difference from 6 factors	AIC Without Satellelite	Difference from 6 factors	AIC Without SINE	Difference from 6 factors
Negative Binomial Regression
CNV_270HapMap	12353	12565	212	12378	25	12351	-2	12386	33	12352	-1	12356	3
CNV_450HapMap	30401	30489	88	30403	2	30399	-2	30440	39	30433	32	30415	14
CNV_WTCCC	22553	22756	203	22564	11	22562	9	22607	54	22557	4	22552	-1				CNV 270HapMap
rareCNV_Schizophrenia_Case	46608	46807	199	46606	-2	46607	-1	46630	22	46652	44	46606	-2				CNV 450HapMap
rareCNV_Schizophrenia_Control	40538	40802	264	40549	11	40537	-1	40570	32	40565	27	40536	-2				CNV WTCCC
																	rareCNV Schizophrenia Case
Poisson Regression																	rareCNV Schizophrenia Control
CNV_270HapMap	12359	12575	216	12384	25	12357	-2	12390	31	12358	-1	12362	-3
CNV_450HapMap	30502	30598	96	30504	2	30500	-2	30544	42	30539	37	30518	-16
CNV_WTCCC	23047	23299	252	23061	14	23057	10	23104	57	23051	4	23045	2
rareCNV_Schizophrenia_Case	68277	69029	752	68278	1	68276	-1	68324	47	68497	220	68276	1
rareCNV_Schizophrenia_Control	61566	62618	1052	61632	66	61565	-1	61621	55	61716	150	61564	2
Linear Regression
CNV_270HapMap	-81294.8	-81001.8	292.96	-81246	48.77	-81295.8	-1.01	-81257.1	37.74	-81291.8	3	-81289.2	-5.59
CNV_450HapMap	-43591.9	-43502.3	89.55	-43590.9	0.98	-43593.7	-1.86	-43553.2	38.68	-43531.8	60.09	-43580	-11.83
CNV_WTCCC	-50481.4	-50239.9	241.44	-50457.6	23.79	-50464.4	16.96	-50432.3	49.09	-50469.3	12.1	-50482	0.61
rareCNV_Schizophrenia_Case	32204.8	32334.7	129.89	32205.4	0.58	32203	-1.89	32208.7	3.86	32311.3	106.41	32202.9	1.99
rareCNV_Schizophrenia_Control	28830.8	29019.5	188.71	28850.4	19.58	28829	-1.78	28835.4	4.56	28910.7	79.9	28828.9	1.94
All Repeats Combined as Factor
response~(CpG_Island_Coverage)+(All_Repeats_Coverage)+(Methylation) or without Methylation
	AIC With Methylation	AIC Without Methylation	Difference
Negative Binomial Regression
CNV_270HapMap	12394	12649	255
CNV_450HapMap	30441	30552	111
CNV_WTCCC	22620	22867	247
rareCNV_Schizophrenia_Case	46651	46896	245
rareCNV_Schizophrenia_Control	40579	40880	301
Poisson Regression
CNV_270HapMap	12398	12661	263
CNV_450HapMap	30548	30672	124
CNV_WTCCC	23122	23438	316
rareCNV_Schizophrenia_Case	68469	69504	1035
rareCNV_Schizophrenia_Control	61692	63045	1353
Linear Regression
CNV_270HapMap	-81239.2	-80887.1	352.05
CNV_450HapMap	-43521.3	-43398.6	122.68
CNV_WTCCC	-50400.6	-50099.4	301.16
rareCNV_Schizophrenia_Case	32309.5	32507.1	197.68
rareCNV_Schizophrenia_Control	28910.4	29171.8	261.4
